# Supplementary material for: Influence of Pd and Pt Promotion in Gold Based Bimetallic Catalysts on Selectivity Modulation in Furfural Base-Free Oxidation
Source: MDPI journal article supplement (doi:10.3390/catal11101226), 2021-10-12
Supplement: s1 [file s1]

# Influence of Pd and Pt Promotion in Gold Based Bimetallic Catalysts on Selectivity Modulation in Furfural Base-Free Oxidation

Hisham K. Al Rawas, Camila P. Ferraz, Joëlle Thuriot-Roukos, Svetlana Heyte, Sébastien Paul, and Robert Wojcieszak \*

Univ. Lille, CNRS, Centrale Lille, Univ. Artois, UMR 8181-UCCS-Unité de Catalyse et Chimie du Solide, F-59000 Lille, France; hisham.khalifehalrawas.etu@univ-lille.fr (H.K.A.R.); camila.palombo-ferraz@centraledlille.fr (C.P.F.); joelle.thuriot@univ-lille.fr (J.T.-R.); svetlana.heyte@univ-lille.fr (S.H.); sebastien.paul@centraledlille.fr (S.P.)

\* Correspondence: Robert.wojcieszak@univ-lille.fr; Tel.: +33-(0)3-2067-6008

Three different metal loadings were studied: 0.5 wt.%, 1.25 wt.% and 2 wt.%. The ratios between gold and the second metal was varied at 3:1, 1:1 and 1:3.

**Table S1.** DoE procedure applied for the study of bimetallic systems.

| Number of catalysts | M-Au/TiO <sub>2</sub> | Ratio M/Au, molar |    | Matrix |     |    |    |
|---------------------|-----------------------|-------------------|----|--------|-----|----|----|
|                     |                       | M                 | Au | Run    | Blk | A  | B  |
| 1                   | 0.5                   | 1                 | 1  | 1      | 1   | -1 | -1 |
| 2                   | 1.25                  | 1                 | 1  | 2      | 1   | 1  | -1 |
| 2                   | 1.25                  | 1                 | 1  | 3      | 1   | -1 | 1  |
| 2                   | 1.25                  | 1                 | 1  | 4      | 1   | 1  | 1  |
| 3                   | 2                     | 1                 | 1  | 5      | 1   | -1 | 0  |
| 4                   | 0.5                   | 1                 | 3  | 6      | 1   | 1  | 0  |
| 5                   | 1.25                  | 1                 | 3  | 7      | 1   | 0  | -1 |
| 6                   | 2                     | 1                 | 3  | 8      | 1   | 0  | 1  |
| 7                   | 0.5                   | 3                 | 1  | 9      | 1   | 0  | 0  |
| 8                   | 1.25                  | 3                 | 1  | 10     | 1   | 0  | 0  |
| 9                   | 2                     | 3                 | 1  | 11     | 1   | 0  | 0  |

The synthesis of bimetallic catalysts has been conducted in the REALCAT high-throughput equipment by varying the preparation conditions using a DoE. A Response Surface Design (Central Composite) was created. It was designed for 3 factors to model curvature data and identify factor settings that optimize the response. The Central composite design (CCD) was used with 2 factors at three levels of evaluation (low (-1) and high (+1)) and central level (0). The central level was also repeated 3 times to evaluate the error of the DoE model. The aforementioned “levels” are used in CCD to easily represent the minimum, the central and the maximum values of a factor influencing the catalyst activity. In CCD, all the possible combinations of high and low levels are studied for the 2 factors. Hence, the total number of conditions for the CCD was 11 by metals as calculated:  $2n + 3$  repetitions at 0 level (where  $n = 2$ , the number of factors in this study and 3 is the number of levels). As the “Metal” are non-numerical factors, no zero level can be applied for this parameter. Therefore, 2 CCD were conducted one for Pt (11 experiences) and the second one for Pd (11 experiences), 22 experiences for both metal. When varying all the parameters a matrix is built using the “minitab” software.

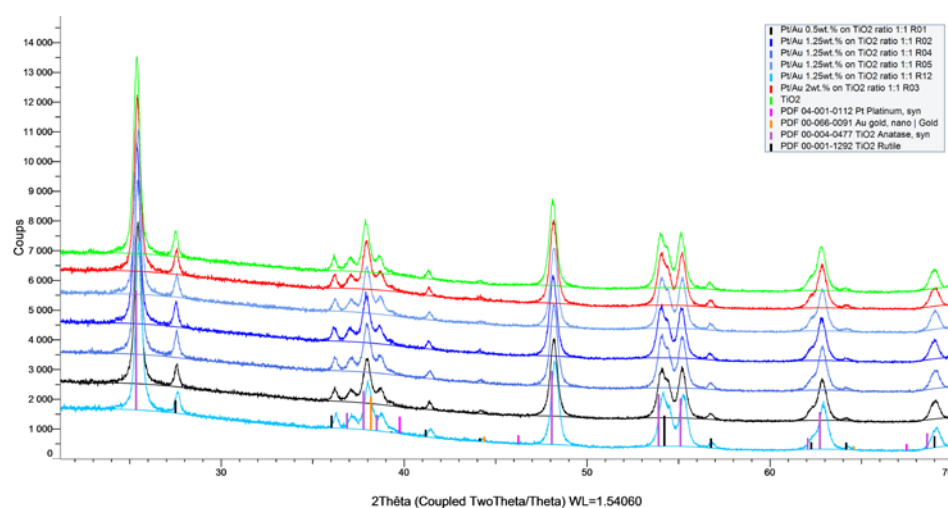

Figure S1. X-ray diffractograms of 0.5, 1.25, and 2wt.% of Pt-Au/TiO<sub>2</sub>, ratio 1:1.

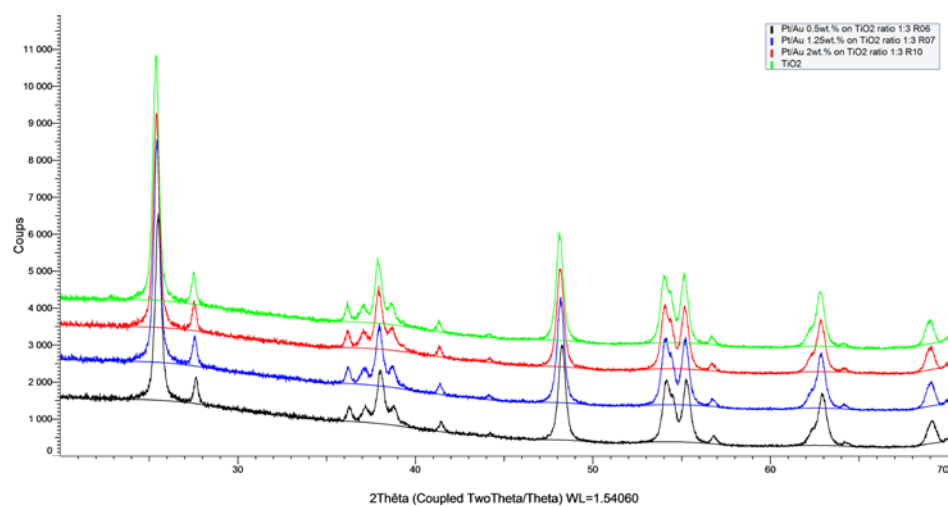

Figure S2. X-ray diffractograms of 0.5, 1.25, and 2wt.% of Pt-Au/TiO<sub>2</sub>, ratio 1:3.

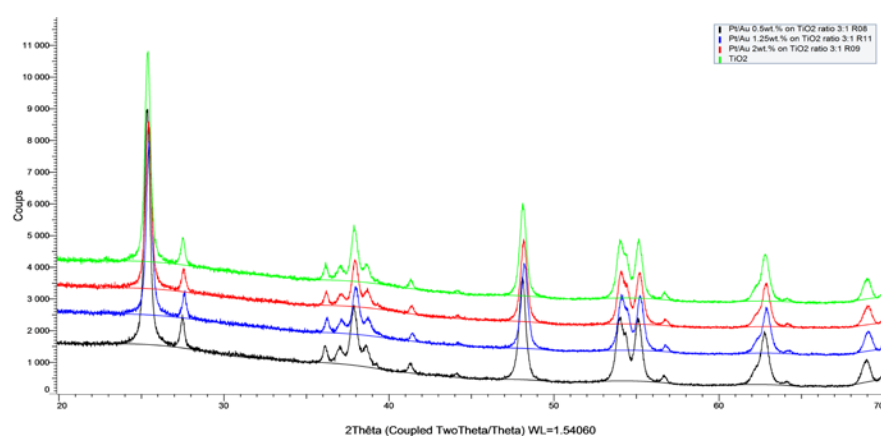

Figure S3. X-ray diffractograms of 0.5, 1.25, and 2wt.% of Pt-Au/TiO<sub>2</sub>, ratio 3:1.

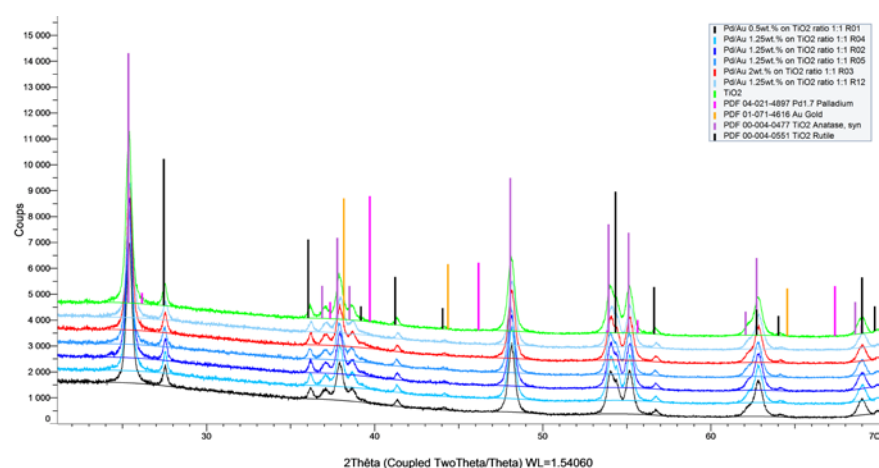

Figure S4. X-ray diffractograms of 0.5, 1.25, and 2wt.% of Pd-Au/TiO<sub>2</sub>, ratio 1:1.

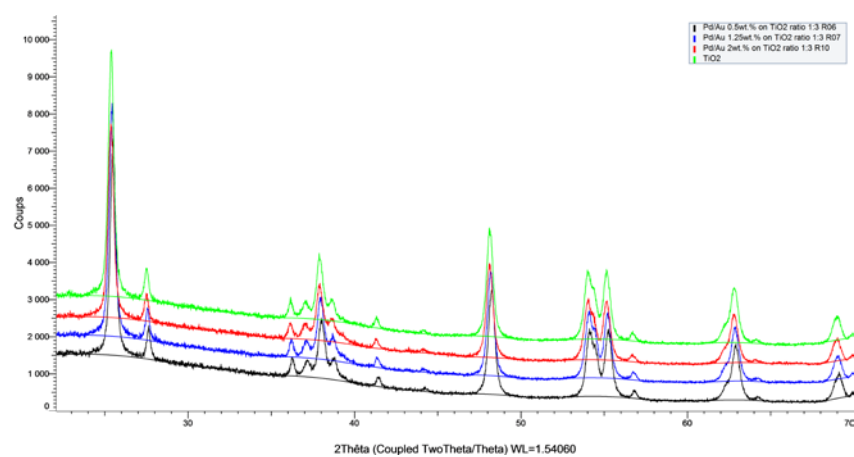

Figure S5. X-ray diffractograms of 0.5, 1.25, and 2wt.% of Pd-Au/TiO<sub>2</sub>, ratio 1:3.

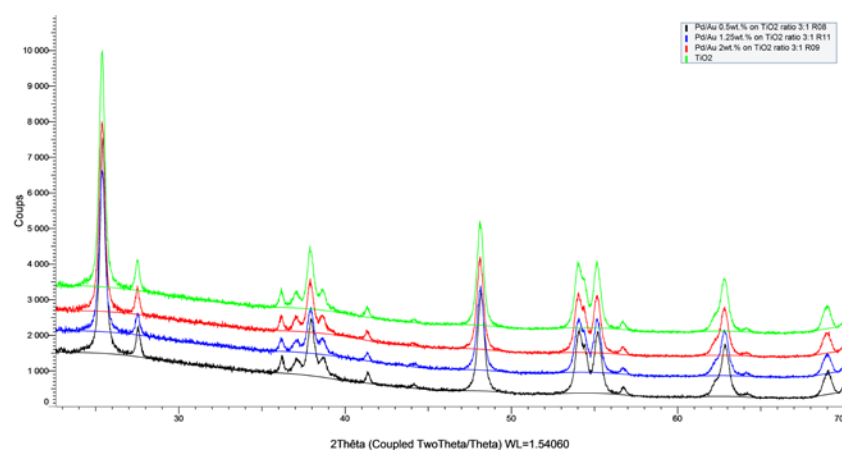

Figure S6. X-ray diffractograms of 0.5, 1.25, and 2wt.% of Pd-Au/TiO<sub>2</sub>, ratio 3:1.

**Table S2.** XRF and ICP analyses results obtained for Au-Pt/TiO<sub>2</sub> catalysts.

|                                           |                               | Mean Value wt. % |       |       |                      |      |      |       |
|-------------------------------------------|-------------------------------|------------------|-------|-------|----------------------|------|------|-------|
|                                           |                               | XRF              |       |       |                      | ICP  |      |       |
| Pt-Au/TiO <sub>2</sub><br>Expected values | Expected molar<br>Ratio Pt:Au | Pt               | Au    | Au+Pt | Pt:Au<br>molar ratio | Pt   | Au   | Au+Pt |
| 0.5                                       | 1:1                           | 0.14             | 0.28  | 0.42  | 1 : 1.98             | 0.16 | 0.24 | 0.40  |
| 1.25                                      | 1:1                           | 0.38             | 0.69  | 1.07  | 1 : 1.80             | 0.42 | 0.62 | 1.04  |
| 2                                         | 1:1                           | 0.38             | 0.68  | 1.06  | 1 : 1.77             | 0.75 | 1.02 | 1.77  |
| 0.5                                       | 1:3                           | 0.38             | 0.67  | 1.05  | 1 : 1.75             | 0.12 | 0.37 | 0.49  |
| 1.25                                      | 1:3                           | 0.71             | 1.04  | 1.75  | 1 : 1.45             | 0.29 | 0.90 | 1.18  |
| 2                                         | 1:3                           | 0.09             | 0.42  | 0.51  | 1 : 4.62             | 0.43 | 1.36 | 1.79  |
| 0.5                                       | 3:1                           | 0.27             | 1.02  | 1.29  | 1 : 3.74             | 0.19 | 0.13 | 0.32  |
| 1.25                                      | 3:1                           | 0.42             | 1.54  | 1.96  | 1 : 3.63             | 0.50 | 0.26 | 0.77  |
| 2                                         | 3:1                           | 0.17             | 0.14  | 0.31  | 1.23 : 1             | 1.19 | 0.50 | 1.69  |
| 2%Pt/TiO <sub>2</sub>                     |                               | 0.949            | 0.005 |       |                      |      |      |       |

**Table S3.** XRF and ICP analyses results obtained for Au-Pd/TiO<sub>2</sub> catalysts.

|                                           |                               | Mean Value wt. % |      |       |                      |      |      |       |
|-------------------------------------------|-------------------------------|------------------|------|-------|----------------------|------|------|-------|
|                                           |                               | XRF              |      |       |                      | ICP  |      |       |
| Pd-Au/TiO <sub>2</sub><br>Expected values | Expected molar<br>Ratio Pd:Au | Pd               | Au   | Au+Pd | Pd:Au<br>molar ratio | Pd   | Au   | Au+Pd |
| 0.5                                       | 1:1                           | 0.45             | 0.38 | 0.84  | 1 : 0.46             | 0.18 | 0.31 | 0.49  |
| 1.25                                      | 1:1                           | 1.27             | 0.87 | 2.14  | 1 : 0.37             | 0.48 | 0.89 | 1.37  |
| 2                                         | 1:1                           | 1.37             | 1.37 | 2.75  | 1 : 0.54             | 0.68 | 1.29 | 1.97  |
| 0.5                                       | 1:3                           | 1.00             | 0.46 | 1.45  | 1 : 0.25             | 0.09 | 0.40 | 0.49  |
| 1.25                                      | 1:3                           | 1.03             | 1.12 | 2.14  | 1 : 0.59             | 0.22 | 1.15 | 1.37  |
| 2                                         | 1:3                           | 0.69             | 1.69 | 2.38  | 1 : 1.33             | 0.29 | 1.59 | 1.88  |
| 0.5                                       | 3:1                           | 1.12             | 0.21 | 1.33  | 9.71 : 1             | 0.30 | 0.17 | 0.47  |
| 1.25                                      | 3:1                           | 1.04             | 0.52 | 1.57  | 3.69 : 1             | 0.72 | 0.45 | 1.17  |
| 2                                         | 3:1                           | 1.42             | 0.82 | 2.24  | 3.21 : 1             | 1.21 | 0.78 | 1.99  |
